# Supplementary material for: Human Platelet Lysate Supports Efficient Expansion and Stability of Wharton’s Jelly Mesenchymal Stromal Cells via Active Uptake and Release of Soluble Regenerative Factors
Source: MDPI journal article supplement (doi:10.3390/ijms21176284), 2020-08-31
Supplement: s1 [file s1]

# TABLE S1

**Table S1:** Cytokines and growth factors present in culture supplements derived from blood components (hLP, hS and FSB). n = 3, mean  $\pm$  SD

| Factors            | hLP (pg/ml)                           | hS (pg/ml)                            | FSB (pg/ml)                           |
|--------------------|---------------------------------------|---------------------------------------|---------------------------------------|
| Angiogenin         | $1.3 \times 10^5 \pm 4.5 \times 10^4$ | $9.0 \times 10^3 \pm 4.4 \times 10^3$ | $7.2 \pm 3.2$                         |
| CCL5/RANTES        | $8.6 \times 10^4 \pm 1.3 \times 10^4$ | $2.9 \times 10^3 \pm 1.1 \times 10^3$ | $0.3 \pm 0.3$                         |
| CXCL2/GRO $\beta$  | $2.4 \times 10^3 \pm 2.1 \times 10^2$ | $23.8 \pm 10.0$                       | $4.7 \pm 0.0$                         |
| CXCL1/GRO $\alpha$ | $9.9 \times 10^4 \pm 5.5 \times 10^2$ | $5.5 \times 10^2 \pm 1.5 \times 10^2$ | $2.3 \times 10^2 \pm 2.0 \times 10^2$ |
| EGF                | $4.0 \times 10^2 \pm 32.44$           | $9.0 \pm 3.7$                         | $2.5 \pm 0.9$                         |
| FGF Basic          | $4.3 \times 10^2 \pm 28.50$           | $22.0 \pm 8.8$                        | $2.2 \pm 0.6$                         |
| G-CSF              | $1.7 \times 10^3 \pm 1.4 \times 10^2$ | $92.9 \pm 36.0$                       | $7.2 \pm 6.2$                         |
| GM-CSF             | $5.4 \times 10^2 \pm 50.9$            | $63.3 \pm 29.2$                       | $3.4 \pm 3.0$                         |
| HGF                | $4.8 \times 10^2 \pm 33.4$            | $1.4 \times 10^2 \pm 46.58$           | $1.2 \pm 2.1$                         |
| ICAM-1             | $8.2 \times 10^5 \pm 1.2 \times 10^5$ | $1.5 \times 10^6 \pm 2.5 \times 10^5$ | $2.5 \times 10^3 \pm 8.6 \times 10^2$ |
| IGFBP-1            | $9.5 \times 10^4 \pm 6.2 \times 10^2$ | $2.0 \times 10^3 \pm 1.6 \times 10^3$ | $1.9 \times 10^2 \pm 0.0$             |
| IGFBP-2            | $1.9 \times 10^5 \pm 1.2 \times 10^5$ | $3.7 \times 10^4 \pm 3.8 \times 10^4$ | $28.6 \pm 24.8$                       |
| IGFBP-3            | $7.3 \times 10^5 \pm 1.1 \times 10^5$ | $2.0 \times 10^6 \pm 2.3 \times 10^5$ | $6.6 \times 10^3 \pm 1.7 \times 10^3$ |
| IL-6               | $43.36 \pm 4.8$                       | $6.6 \pm 3.2$                         | $2.3 \pm 0.0$                         |
| IL-10              | $2.8 \times 10^2 \pm 19.5$            | $21.0 \pm 7.5$                        | $6.0 \pm 1.1$                         |
| MIF                | $1.1 \times 10^5 \pm 1.9 \times 10^4$ | $1.8 \times 10^3 \pm 3.5 \times 10^2$ | $2.5 \times 10^2 \pm 20.8$            |
| MSP/MST1           | $4.2 \times 10^5 \pm 4.3 \times 10^4$ | $1.4 \times 10^5 \pm 4.2 \times 10^4$ | $80.8 \pm 48.3$                       |
| PDGF-BB            | $1.4 \times 10^4 \pm 1.5 \times 10^3$ | $29.1 \pm 11.5$                       | $0.1 \pm 0.1$                         |
| PDGF-AA            | $3.7 \times 10^3 \pm 5.0 \times 10^2$ | $1.8 \times 10^2 \pm 45.4$            | $2.7 \pm 1.1$                         |
| TGF $\alpha$       | $1.4 \times 10^2 \pm 24.3$            | $14.3 \pm 14.1$                       | $4.2 \pm 1.3$                         |
| Osteoprotegerin    | $3.9 \times 10^2 \pm 1.2 \times 10^2$ | $2.1 \times 10^2 \pm 419$             | $2.3 \pm 2.0$                         |
| PDGF AB            | $5.7 \times 10^3 \pm 6.7 \times 10^2$ | $3.4 \times 10^2 \pm 83.4$            | $12.8 \pm 11.1$                       |
| VCAM-1             | $2.8 \times 10^5 \pm 1.0 \times 10^5$ | $2.4 \times 10^5 \pm 7.5 \times 10^4$ | $5.5 \times 10^2 \pm 0.0$             |
| VEGF-A             | $90.13 \pm 20.6$                      | $20.1 \pm 7.6$                        | $0.4 \pm 0.7$                         |

# TABLE S2

**Table S2:** Karyotype evaluation of the different WJMSC donors belonging to the Master Bank of WJ-MSC

| Donor      | Passage | G Banding karyotype | Interpretation                      |
|------------|---------|---------------------|-------------------------------------|
| WJ-MSC 180 | Pase 2  | 46XY                | No numeric or structural alteration |
| WJ-MSC 182 | Pase 1  | 46XY                | No numeric or structural alteration |
| WJ-MSC 190 | Pase 1  | 46XY                | No numeric or structural alteration |
| WJ-MSC 181 | Pase 1  | 46XY                | No numeric or structural alteration |
| WJ-MSC 195 | Pase 1  | 46XY                | No numeric or structural alteration |
| WJ-MSC 197 | Pase 1  | 46XY                | No numeric or structural alteration |
| WJ-MSC 198 | Pase 1  | 46XY                | No numeric or structural alteration |
| WJ-MSC 189 | Pase 1  | 46XY                | No numeric or structural alteration |
| WJ-MSC 191 | Pase 2  | 46XY                | No numeric or structural alteration |
| WJ-MSC 206 | Pase 1  | 46XY                | No numeric or structural alteration |
| WJ-MSC 200 | Pase 1  | 46XY                | No numeric or structural alteration |
| WJ-MSC 203 | Pase 1  | 46XX                | No numeric or structural alteration |
| WJ-MSC 205 | Pase 1  | 46XX                | No numeric or structural alteration |
| WJ-MSC 196 | Pase 1  | 46XX                | No numeric or structural alteration |
| WJ-MSC 199 | Pase 1  | 46XX                | No numeric or structural alteration |
| WJ-MSC 202 | Pase 1  | 46XY                | No numeric or structural alteration |

# FIGURE S1

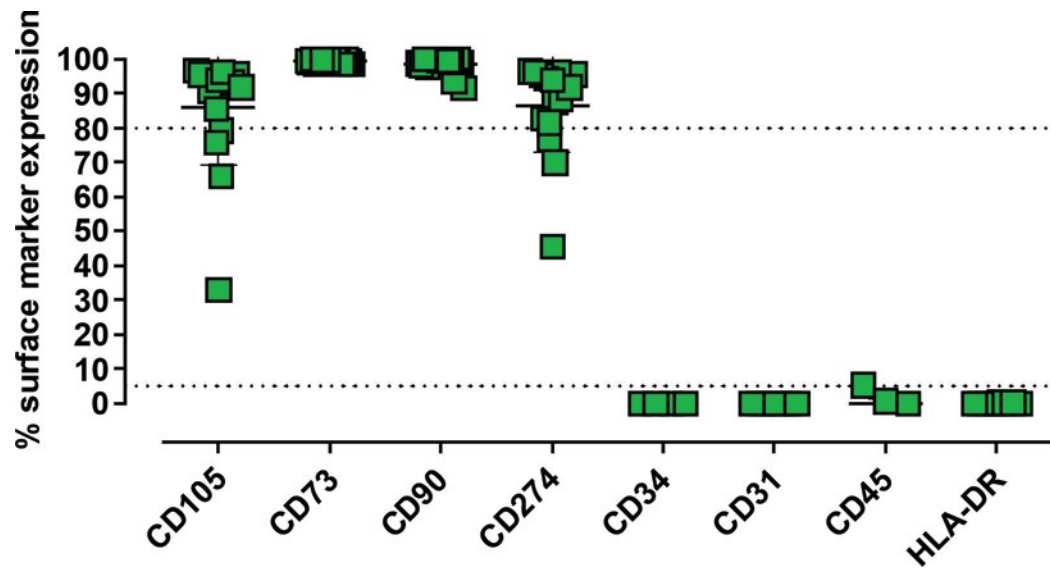

**Figure S1:** Immunophenotypic profile of WJ-MSC belonging to the Master Cell Bank. Data showed as expression percentage of surface markers; n = 16, mean $\pm$ SD, \*p<0,05 analyze by Tukey's test.

## FIGURE S2

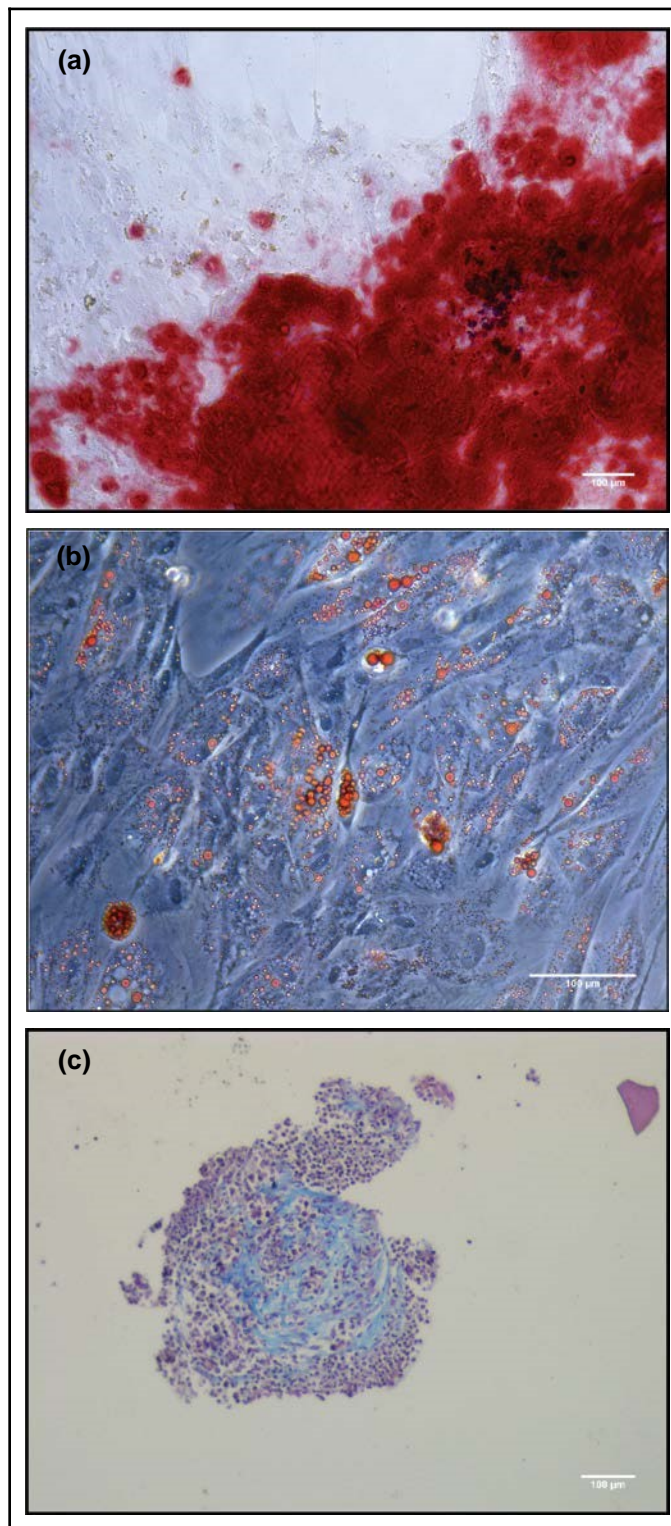

**Figure S2:** Evaluation of the differentiation potential of WJ-MSC. (a) Differentiation to the osteoblast lineage, red coloration characteristic of calcium deposits (staining with alizarin red), Magnification 100X, (b) Differentiation to the adipogenic lineage, red coloration characteristic of fat vacuoles (staining with oil Red), Magnification 200X, (c) Differentiation to the chondrogenic lineage, coloration blue characteristic of type I collagen matrix (staining with Masson's trichrome), Magnification 100X. Representation of one donor of WJ-MSC.
