# Supplementary material for: Human Platelet Lysate Supports Efficient Expansion and Stability of Wharton’s Jelly Mesenchymal Stromal Cells via Active Uptake and Release of Soluble Regenerative Factors
Source: Int J Mol Sci. 2020 Aug 31;21(17):6284. doi: 10.3390/ijms21176284 (PMC7503902; doi:10.3390/ijms21176284)
Supplement: Supplementary file 1 [file ijms-21-06284-s001.zip]

Archive with 7 entries (7 files):
- Figure S1.jpg
- Figure S2 a.jpg
- Figure S2 b.jpg
- Figure S2 c.jpg
- suplementary Material.pdf
- Table S1.jpg
- Table S2.jpg
